# Supplementary material for: Validating an ion mobility spectrometry-quadrupole time of flight mass spectrometry method for high-throughput pesticide screening
Source: Royal Society of Chemistry journal article supplement (doi:10.1039/c9an00873j), 2019-01-01
Supplement: c9an00873j1.pdf [file c9an00873j1.pdf]

Supporting Information

**Validating an Ion Mobility Spectrometry-Quadrupole Time of Flight  
Mass Spectrometry Method for High-throughput Pesticide  
Screening**

**Xiu-Ping Chen<sup>1</sup>, Fang Zhang<sup>2,1\*</sup> and Yin-Long Guo<sup>1\*</sup>**

<sup>1</sup> State Key Laboratory of Organometallic Chemistry and National Center for Organic Mass Spectrometry in Shanghai, Shanghai Institute of Organic Chemistry, Chinese Academy of Sciences, 345 Lingling Road, Shanghai 200032, China

<sup>2</sup> The Research Center of Chiral Drugs, Innovation Research Institute of Traditional Chinese Medicine, Shanghai University of Traditional Chinese Medicine, 1200 Cailun Road, Shanghai 201203, China

**Table S1. Accurate IM-MS database of 50 pesticides**

| Pesticide         | CAS         | Molecular formula | [M+H] <sup>+</sup> <sup>a</sup> | Major product ion <sup>b</sup>                        | CE <sup>c</sup> | CCS <sup>d</sup> | Classify         |
|-------------------|-------------|-------------------|---------------------------------|-------------------------------------------------------|-----------------|------------------|------------------|
| Cadusafos         | 95465-99-9  | C10H23O2PS2       | 271.0950                        | 158.9698,215.0324,130.9385                            | 10              | 157.6            | organophosphates |
| Fonofos           | 944-22-9    | C10H15OPS2        | 247.0375                        | 137.0184,108.9871,124.9821                            | 10              | 146.4            | organophosphates |
| Diazinon          | 333-41-5    | C12H21N2O3PS      | 305.1083                        | 169.0794,153.1022,96.9508,277.0770,249.0457           | 25              | 168.4            | organophosphates |
| Etrimfos          | 38260-54-7  | C10H17N2O4PS      | 293.0719                        | 124.9821,265.0406,142.9926,109.0049,78.9943           | 25              | 161.9            | organophosphates |
| Pirimiphos-methyl | 29232-93-7  | C11H20N3O3PS      | 306.1036                        | 164.1182,108.0556,124.9821,96.9508,67.0291,136.0869   | 35              | 165.7            | organophosphates |
| Fenthion          | 55-38-9     | C10H15O3PS2       | 279.0273                        | 247.0011,169.0140,153.0369,138.0498,124.9821,108.9871 | 20              | 157.4            | organophosphates |
| Quinalphos        | 13593-03-8  | C12H15N2O3PS      | 299.0614                        | 163.0324,242.9988,147.0553,129.0447,96.9508           | 25              | 162.3            | organophosphates |
| Fenamiphos        | 22224-92-6  | C13H22NO3PS       | 304.1131                        | 217.0083,234.0348,201.9848,169.0862,108.0570          | 20              | 171.6            | organophosphates |
| Prothiofos        | 34643-46-4  | C11H15Cl2O2PS2    | 344.9701                        | 240.9041,302.9231,274.8918,204.9274,158.9698,109.9918 | 10              | 168.2            | organophosphates |
| Triazophos        | 24017-47-8  | C12H16N3O3PS      | 314.0723                        | 178.0433,119.0604,96.9508,150.9977                    | 20              | 171.7            | organophosphates |
| Edifenphos        | 17109-49-8  | C14H15O2PS2       | 311.0324                        | 201.0134,172.9821,283.0011,111.0263,109.0106          | 20              | 161.7            | organophosphates |
| Buprofezin        | 69327-76-0  | C16H23N3OS        | 306.1635                        | 116.0528,250.1009,106.0651,57.0699,145.0396,208.0539  | 15              | 173.2            | diazthines       |
| Molinate          | 2212-67-1   | C9H17NOS          | 188.1104                        | 126.0913,83.0855,98.0964,55.0542                      | 10              | 138.8            | carbamates       |
| Atrazine          | 1912-24-9   | C8H14ClN5         | 216.1010                        | 146.0228,138.0774,174.0541,132.0323,104.0010,96.0556  | 25              | 148.4            | triazines        |
| Simeconazole      | 149508-90-7 | C14H20FN3OSi      | 294.1432                        | 276.1327,135.0605,115.0574,70.0400,73.0468            | 20              | 170.0            | triazoles        |
| Myclobutanil      | 88671-89-0  | C15H17ClN4        | 289.1215                        | 70.0400,125.0153,151.0309,220.0888                    | 20              | 174.5            | triazoles        |
| Pyrazophos        | 13457-18-6  | C14H20N3O5PS      | 374.0934                        | 222.0873,238.0645,194.0560,346.0621,317.0356          | 20              | 191.5/ 185.7     | organophosphates |
| Azoxystrobin      | 131860-33-8 | C22H17N3O5        | 404.1241                        | 372.0979,344.1030,329.0795,316.1081                   | 15              | 195.7            | strobilurins     |
| Fluquinconazole   | 136426-54-5 | C16H8Cl2FN5O      | 376.0163                        | 349.0054,163.0302,306.9836,287.0256,272.0147          | 25              | 177.1/ 184.1     | triazoles        |
| Dicrotophos       | 141-66-2    | C8H16NO5P         | 238.0839                        | 193.0260,127.0155,112.0757,72.0444                    | 10              | 148.7/ 142.8     | organophosphates |
| Trifluralin       | 1582-09-8   | C13H16F3N3O4      | 336.1166                        | 276.0591,252.0227,294.0696,236.0278,248.0278          | 15              | 168.4            | dinitroanilines  |

| Pesticide        | CAS         | Molecular formula                                                              | [M+H] <sup>+</sup> | Major product ion                                     | CE | CCS          | Classify              |
|------------------|-------------|--------------------------------------------------------------------------------|--------------------|-------------------------------------------------------|----|--------------|-----------------------|
| Triadimefon      | 43121-43-3  | C <sub>14</sub> H <sub>16</sub> ClN <sub>3</sub> O <sub>2</sub>                | 294.1004           | 197.0728,225.0677,155.0258,141.0102,57.0699           | 5  | 173.5        | triazoles             |
| Penconazole      | 66246-88-6  | C <sub>13</sub> H <sub>15</sub> Cl <sub>2</sub> N <sub>3</sub>                 | 284.0716           | 70.0400,158.9763,172.9919                             | 15 | 165.3        | triazoles             |
| Trifloxystrobin  | 141517-21-7 | C <sub>20</sub> H <sub>19</sub> F <sub>3</sub> N <sub>2</sub> O <sub>4</sub>   | 409.1370           | 186.0525,206.0812,132.0808,116.0495,162.0913          | 15 | 188.1        | strobilurins          |
| Pyridaben        | 96489-71-3  | C <sub>19</sub> H <sub>25</sub> ClN <sub>2</sub> OS                            | 365.1449           | 132.0934,105.0699,309.0823,147.1168,119.0855          | 10 | 192.5/ 187.0 | pyridazinones         |
| Pyrimidifen      | 105779-78-0 | C <sub>20</sub> H <sub>28</sub> ClN <sub>3</sub> O <sub>2</sub>                | 378.1943           | 169.0401,124.0883,184.0636,89.0386                    | 30 | 178.0/ 188.2 | pyrimidines           |
| Dimethenamid     | 87674-68-8  | C <sub>12</sub> H <sub>18</sub> ClNO <sub>2</sub> S                            | 276.0820           | 244.0557,168.0841,111.0263,73.0648,138.0372           | 10 | 154.8        | amides                |
| Metalaxyl        | 57837-19-1  | C <sub>15</sub> H <sub>21</sub> NO <sub>4</sub>                                | 280.1543           | 220.1332,192.1383,248.1281,160.1121,148.1121          | 10 | 160.5        | amides                |
| Diphenamid       | 957-51-7    | C <sub>16</sub> H <sub>17</sub> NO                                             | 240.1383           | 134.0964,91.0542,72.0444,239.1305,118.0651            | 20 | 153.9        | amides                |
| Cyprodinil       | 121552-61-2 | C <sub>14</sub> H <sub>15</sub> N <sub>3</sub>                                 | 226.1339           | 93.0573,108.0808,119.0604,91.0542,210.1026            | 40 | 152.6        | pyrimidines           |
| Napropamide      | 15299-99-7  | C <sub>17</sub> H <sub>21</sub> NO <sub>2</sub>                                | 272.1645           | 129.1148,199.0754,171.0804,114.0913,100.0757,74.0964  | 15 | 164.3        | amides                |
| Pretilachlor     | 51218-49-6  | C <sub>17</sub> H <sub>26</sub> ClNO <sub>2</sub>                              | 312.1725           | 252.1150,176.1434,146.0964,238.0993,162.1277          | 15 | 171.5        | amides                |
| Benalaxyl        | 71626-11-4  | C <sub>20</sub> H <sub>23</sub> NO <sub>3</sub>                                | 326.1751           | 208.1332,266.1539,148.1121,121.0886,91.0542           | 10 | 172.1        | amides                |
| Tebuconazole     | 107534-96-3 | C <sub>16</sub> H <sub>22</sub> ClN <sub>3</sub> O                             | 308.1524           | 70.0400,151.0309,138.9945,125.0153                    | 25 | 167.0        | triazoles             |
| Indoxacarb       | 173584-44-6 | C <sub>22</sub> H <sub>17</sub> ClF <sub>3</sub> N <sub>3</sub> O <sub>7</sub> | 528.0780           | 249.0425,218.0423,293.0324,190.0054,150.0105,203.0189 | 15 | 206.1        | carbamates            |
| Esprocarb        | 85785-20-2  | C <sub>15</sub> H <sub>23</sub> NOS                                            | 266.1573           | 148.1121,91.0542,71.0855,196.0791                     | 15 | 160.7        | carbamates            |
| Fenbuconazole    | 114369-43-6 | C <sub>19</sub> H <sub>17</sub> ClN <sub>4</sub>                               | 337.1215           | 70.0400,125.0153,91.0542,194.0480                     | 25 | 183.5        | triazoles             |
| Butylate         | 2008-41-5   | C <sub>11</sub> H <sub>23</sub> NOS                                            | 218.1573           | 57.0699,156.1383,162.0947,134.0998,100.0757           | 10 | 150.5        | carbamates            |
| Sulfotep         | 3689-24-5   | C <sub>8</sub> H <sub>20</sub> O <sub>5</sub> P <sub>2</sub> S <sub>2</sub>    | 323.0300           | 171.0239,142.9844,182.9971,96.9508,294.9987,266.9674  | 10 | 160.5        | organophosphates      |
| Pyrimethanil     | 53112-28-0  | C <sub>12</sub> H <sub>13</sub> N <sub>3</sub>                                 | 200.1182           | 107.0604,183.0917,181.0760,182.0838,168.0682,82.0651  | 40 | 142.9        | pyrimidines           |
| Fenpropimorph    | 67564-91-4  | C <sub>20</sub> H <sub>33</sub> NO                                             | 304.2635           | 147.1168,130.1226,132.0934,119.0855,116.1070,57.0699  | 35 | 173.0/ 178.1 | morpholines           |
| Ethychlozate     | 27512-72-7  | C <sub>11</sub> H <sub>11</sub> ClN <sub>2</sub> O <sub>2</sub>                | 239.0582           | 165.0214,138.0105,107.0604                            | 15 | 152.7        | indoles               |
| Quizalofop-ethyl | 76578-14-8  | C <sub>19</sub> H <sub>17</sub> ClN <sub>2</sub> O <sub>4</sub>                | 373.0950           | 287.0469,271.0633,299.0582,255.0320,243.0684          | 25 | 191.6/ 199.2 | phenoxyalkanoic acids |
| Flutriafol       | 76674-21-0  | C <sub>16</sub> H <sub>13</sub> F <sub>2</sub> N <sub>3</sub> O                | 302.1099           | 70.0400,123.0241,109.0448,233.0772,137.0397           | 20 | 167.2        | triazoles             |

| Pesticide   | CAS         | Molecular formula | [M+H] <sup>+</sup> | Major product ion                                     | CE | CCS          | Classify    |
|-------------|-------------|-------------------|--------------------|-------------------------------------------------------|----|--------------|-------------|
| Carboxine   | 5234-68-4   | C12H13NO2S        | 236.0740           | 143.0161,86.9899,124.0215,93.0573,132.0444,117.0369   | 15 | 150.5        | amides      |
| Acetamiprid | 135410-20-7 | C10H11ClN4        | 223.0745           | 126.0105,56.0495,98.9996,90.0338                      | 20 | 153.7        | nicotiniums |
| Picolinafen | 137641-05-5 | C19H12F4N2O2      | 377.0908           | 238.0474,359.0802,256.0580,337.0783,266.0423          | 20 | 188.9        | pyridines   |
| Fenamidone  | 161326-34-7 | C17H17N3OS        | 312.1165           | 92.0495,236.1182,165.0481,120.0808,103.0542           | 15 | 172.6        | pyrroles    |
| Fluridone   | 59756-60-4  | C19H14F3NO        | 330.1100           | 309.0960,242.0964,294.0725,259.0992,290.0976,287.0916 | 55 | 179.0        | pyridines   |
| Spiroxamine | 118134-30-8 | C18H35NO2         | 298.2741           | 100.1121,144.1383,72.0808,126.1277,58.0651            | 25 | 182.0/ 176.9 | morpholines |

a: accurate mass of [M+H]<sup>+</sup> and its unit is Da;

b: accurate mass of major product ion;

c: optimized collision energy for each pesticide in MS<sup>2</sup> mode;

d: CCS reference value of [M+H]<sup>+</sup> and its unit is Å<sup>2</sup>.

**Table S2. Measured results of 50 pesticides in scallion samples**

| Pesticide               | [M+H] <sup>+</sup> | CCS <sub>1</sub> | CCS <sub>2</sub> | CCS <sub>3</sub> | Average <sup>a</sup> | SD <sup>b</sup> | Deviation <sup>c</sup> | LOD <sup>d</sup> (APCI) | LOD <sup>d</sup> (ESI) |
|-------------------------|--------------------|------------------|------------------|------------------|----------------------|-----------------|------------------------|-------------------------|------------------------|
| Cadusafos               | 271.0950           | 157.9            | 157.7            | 157.6            | 157.7                | 0.15            | 0.1                    | 5                       | 100                    |
| Fonofos                 | 247.0375           | 146.6            | 146.5            | 146.4            | 146.5                | 0.10            | 0.1                    | 20                      | 10                     |
| Diazinon                | 305.1083           | 167.6            | 167.6            | 167.8            | 167.7                | 0.12            | -0.7                   | 10                      | 5                      |
| Etrimfos                | 293.0719           | 161.7            | 161.8            | 161.7            | 161.7                | 0.06            | -0.1                   | 5                       | 5                      |
| Pirimiphos-methyl       | 306.1036           | 165.6            | 165.5            | 165.5            | 165.5                | 0.06            | -0.2                   | 5                       | 5                      |
| Fenthion                | 279.0273           | 157.2            | 157.3            | 157.1            | 157.2                | 0.10            | -0.2                   | 10                      | 50                     |
| Quinalphos              | 299.0614           | 162.1            | 162.1            | 162.1            | 162.1                | 0.00            | -0.2                   | 20                      | 50                     |
| Fenamiphos              | 304.1131           | 170.9            | 170.9            | 170.8            | 170.9                | 0.06            | -0.8                   | 5                       | 10                     |
| Prothiofos              | 344.9701           | 167.9            | 167.8            | 167.8            | 167.8                | 0.06            | -0.3                   | 5                       | 50                     |
| Triazophos              | 314.0723           | 170.9            | 170.9            | 170.8            | 170.9                | 0.06            | -0.8                   | 5                       | 5                      |
| Edifenphos              | 311.0324           | 161.6            | 161.6            | 161.5            | 161.6                | 0.06            | -0.1                   | 10                      | 10                     |
| Buprofezin              | 306.1635           | 173.3            | 173.2            | 173.2            | 173.2                | 0.06            | 0.0                    | 5                       | 5                      |
| Molinate                | 188.1104           | 138.9            | 139.2            | 139.0            | 139.0                | 0.15            | 0.2                    | 5                       | 100                    |
| Atrazine                | 216.1010           | 148.4            | 148.4            | 148.3            | 148.4                | 0.06            | 0.0                    | 5                       | 5                      |
| Dimethenamid            | 276.0820           | 154.7            | 154.6            | 154.6            | 154.6                | 0.06            | -0.2                   | 20                      | 100                    |
| Simeconazole            | 294.1432           | 169.8            | 169.7            | 169.7            | 169.7                | 0.06            | -0.2                   | 10                      | 20                     |
| Fluquinconazole         | 376.0163           | 176.7            | 176.6            | 176.6            | 176.6                | 0.06            | -0.4                   | 20                      | 50                     |
|                         |                    | 183.5            | 183.9            | 183.2            | 183.5                | 0.35            | -0.6                   |                         |                        |
| Dicrotophos             | 238.0839           | 148.9            | 148.7            | 148.9            | 148.8                | 0.12            | 0.2                    | 100                     | 50                     |
|                         |                    | 142.7            | 143.0            | 143.1            | 142.9                | 0.21            | 0.1                    |                         |                        |
| Trifluralin             | 336.1166           | 168.0            | 168.0            | 168.3            | 168.1                | 0.17            | -0.3                   | 10                      | 200                    |
| Triadimefon             | 294.1004           | 172.9            | 172.9            | 172.9            | 172.9                | 0.00            | -0.6                   | 50                      | 50                     |
| Penconazole             | 284.0716           | 165.2            | 165.3            | 165.3            | 165.3                | 0.06            | 0.0                    | 10                      | 50                     |
| Trifloxystrobin         | 409.1370           | 187.2            | 187.2            | 187.3            | 187.2                | 0.06            | -0.8                   | 5                       | 50                     |
|                         |                    | 191.5            | 191.6            | 191.6            | 191.6                | 0.06            | -0.9                   |                         |                        |
| Pyridaben               | 365.1449           | 186.5            | 187.4            | 186.0            | 186.6                | 0.71            | 0.4                    | 50                      | 50                     |
|                         |                    | 177.1            | 177.1            | 177.2            | 177.1                | 0.06            | -0.9                   |                         |                        |
| Pyrimidifen             | 378.1943           | 187.5            | 187.4            | 187.5            | 187.5                | 0.06            | -0.7                   | 5                       | 5                      |
|                         |                    | 160.2            | 160.3            | 160.2            | 160.2                | 0.06            | -0.2                   |                         |                        |
| Metalaxyl               | 280.1543           | 160.2            | 160.3            | 160.2            | 160.2                | 0.06            | -0.2                   | 5                       | 5                      |
| Diphenamid              | 240.1383           | 153.7            | 153.7            | 153.6            | 153.7                | 0.06            | -0.2                   | 20                      | 10                     |
| Cyprodinil              | 226.1339           | 152.6            | 152.6            | 152.5            | 152.6                | 0.06            | -0.1                   | 10                      | 5                      |
| Napropamide             | 272.1645           | 164.0            | 164.0            | 164.0            | 164.0                | 0.00            | -0.3                   | 5                       | 20                     |
| Pretilachlor            | 312.1725           | 170.8            | 170.8            | 170.8            | 170.8                | 0.00            | -0.7                   | 20                      | 5                      |
| Benalaxyl               | 326.1751           | 171.3            | 171.3            | 171.3            | 171.3                | 0.00            | -0.8                   | 5                       | 5                      |
| Myclobutanil            | 289.1215           | 174.1            | 174.1            | 174.0            | 174.1                | 0.06            | -0.4                   | 5                       | 50                     |
|                         |                    | 191.2            | 191.1            | 191.1            | 191.1                | 0.06            | -0.3                   |                         |                        |
| Pyrazophos <sup>e</sup> | 374.0934           | 185.7            | 185.6            | 186.0            | 185.8                | 0.21            | 0.1                    | 5                       | 10                     |
| Esprocarb               | 266.1573           | 160.5            | 160.4            | 160.3            | 160.4                | 0.10            | -0.3                   | 20                      | 50                     |
| Fenbuconazole           | 337.1215           | 182.8            | 182.8            | 182.7            | 182.8                | 0.06            | -0.7                   | 50                      | 50                     |
|                         |                    | 150.4            | 150.2            | 150.0            | 150.2                | 0.20            | -0.3                   |                         |                        |
| Butylate                | 218.1573           | 150.4            | 150.2            | 150.0            | 150.2                | 0.20            | -0.3                   | 5                       | 5                      |
| Tebuconazole            | 308.1524           | 166.4            | 166.4            | 166.4            | 166.4                | 0.00            | -0.6                   | 5                       | 5                      |
| Indoxacarb              | 528.0780           | 205.7            | 205.7            | 205.6            | 205.7                | 0.06            | -0.4                   | 10                      | 100                    |
| Azoxystrobin            | 404.1241           | 195.4            | 195.3            | 195.2            | 195.3                | 0.10            | -0.4                   | 10                      | 20                     |

| Pesticide        | [M+H] <sup>+</sup> | CCS <sub>1</sub> | CCS <sub>2</sub> | CCS <sub>3</sub> | Average | SD   | Deviation | LOD (APCI) | LOD (ESI) |
|------------------|--------------------|------------------|------------------|------------------|---------|------|-----------|------------|-----------|
| Sulfotep         | 323.0300           | 160.6            | 160.4            | 160.3            | 160.4   | 0.15 | -0.1      | 5          | 5         |
| Ethychlozate     | 239.0582           | 152.2            | 152.1            | 152.1            | 152.1   | 0.06 | -0.6      | 5          | 5         |
| Pyrimethanil     | 200.1182           | 142.8            | 142.6            | 142.6            | 142.7   | 0.12 | -0.2      | 5          | 5         |
| Fenpropimorph    | 304.2635           | 172.6            | 172.5            | 172.4            | 172.5   | 0.10 | -0.5      | 5          | 5         |
|                  |                    | 177.6            | 177.4            | 177.3            | 177.4   | 0.15 | -0.7      |            |           |
| Quizalofop-ethyl | 373.0950           | 191.2            | 191.0            | 190.8            | 191.0   | 0.20 | -0.6      | 20         | 10        |
|                  |                    | 198.9            | 198.8            | 198.8            | 198.8   | 0.06 | -0.4      |            |           |
| Flutriafol       | 302.1099           | 166.7            | 166.7            | 166.6            | 166.7   | 0.06 | -0.5      | 20         | 50        |
| Carboxine        | 236.0740           | 150.4            | 150.5            | 150.5            | 150.5   | 0.06 | -0.1      | 10         | 50        |
| Acetamiprid      | 223.0745           | 153.6            | 153.5            | 153.6            | 153.6   | 0.06 | -0.1      | 20         | 100       |
| Picolinafen      | 377.0908           | 188.4            | 188.4            | 188.4            | 188.4   | 0.00 | -0.5      | 5          | 50        |
| Fenamidone       | 312.1165           | 171.9            | 171.9            | 171.9            | 171.9   | 0.00 | -0.7      | 10         | 10        |
| Fluridone        | 330.1100           | 178.5            | 178.6            | 178.7            | 178.6   | 0.10 | -0.4      | 5          | 10        |
|                  |                    | 181.2            | 181.1            | 181.0            | 181.1   | 0.10 | -0.9      |            |           |
| Spiroxamine      | 298.2741           | 175.9            | 175.9            | 175.9            | 175.9   | 0.00 | -1.0      | 5          | 5         |

a: the average of measured CCS values (CCS<sub>1</sub>, CCS<sub>2</sub>, CCS<sub>3</sub>) in three consecutive injection;

b: the standard deviation of measured CCS values in three consecutive injection;

c: the deviation between the average CCS value in table 2 and the reference in database;

d: the unit of LOD (limit of detection) is ng/mL;

e: each pesticide has two CCS values, each CCS value is corresponding to its one isomeric ion.
